# Supplementary material for: Telatinib Is an Effective Targeted Therapy for Pseudomyogenic Hemangioendothelioma
Source: Oxford University Press journal article supplement (doi:10.1158/1078-0432.ccr-17-3512), 2018-03-06
Supplement: 10780432ccr173512-sup-192923_2_supp_4577544_p4fflc.docx [file 10780432ccr173512-sup-192923_2_supp_4577544_p4fflc.docx]

**Supplementary tables**

**Supplementary table 1**

**Primers sequences used for Real-Time qPCR.**

| **Name** | **sequence (5'-3')** |
| --- | --- |
| SERPINE-FOSB_f | GCAAGGCACCTCTGAGAACT |
| SERPINE-FOSB_r | GGGTGAGAAAACCACGTTGC |
| HPRT1_f | TGACACTGGCAAAACAATGCA |
| HPRT1_r | GGTCCTTTTCACCAGCAAGCT |
| FOS_f | TGATACACTCCAAGCGGAGAC |
| FOS_r | CCCCCAGTCAGATCAAGGGA |
| FOSB_f | AGCAGCAGCTAAATGCAGGA |
| FOSB_r | CCAACTGATCTGTCTCCGCC |
| SERPINE1_f | GTCATAGTCTCAGCCCGCAT |
| SERPINE1_r | AGATGAAGGCGTCTTTCCCC |
| KDR_f | GACAACCAGACGGACAGTGG |
| KDR_r | CTTTTGCTGGGCACCATTCC |
| FLT1_f | GGCCTCGCTCAAGATTGACT |
| FLT1_r | TTTCCTTTCCAGCTCAGCGT |
| FLT4_f | CCCAACGACCTACAAAGGCT |
| FLT4_r | CCTGGTCACAGCCACATTCT |
| KIT_f | ACTGTGGCCGTTATCTGGAAG |
| KIT_r | CTTGGGTGACAACACAACCC |
| PDGFRA_f | CATTGAGACGGGTTCCAGCA |
| PDGFRA_r | CGAATCCGCCAGTTACAGGA |
| FAS_f | ACTTGGGGTGGCTTTGTCTT |
| FAS_r | CCTTTCTGTGCTTTCTGCATGT |
| JAG1_f | GCGGCCTCTGAAGAACAGAA |
| JAG1_r | AGCAACAGATCCAAGCCACA |
| HEY1_f | TGAGAAGCAGGTAATGGAGCAA |
| HEY1_r | TAGTCCATAGCAAGGGCGTG |
| VWF_f | TGCCCACCCTTTGATGAACA |
| VWF_r | ACAGCAGGTGCCTGGAATTT |
| ADAMTS13_f | GGTGAAATCGTGAGCCCCTC |
| ADAMTS13_r | GGTGTCCCGGATCAAGATGT |

**Supplementary table 2**

**ShRNA used for inhibition of the receptors, for each receptor the most effective shRNA was selected as tested with Real-Time qPCR.**

| **Target** | **Clone ID** |
| --- | --- |
| KDR | TRCN0000001687 |
| FLT4 | TRCN0000256730 |
| KIT | TRCN0000271279 |
| PDGFRA | TRCN0000196272 |
| FLT1 | TRCN0000000632 |

**Supplementary table 3**

**Sequence of the primers used for ChIP-qPCR.**

| **Name** | **Sequence (5'-3')** |
| --- | --- |
| 1-Serpine1_100761452_f | TGTGTCCAGAGAAAGGCGTA |
| 1-Serpine1_100761452_r | CTGGCCAGATTCCATCCCTC |
| 2-Serpine1_100765760_f | CCCGTGTGACCCCTTACAAA |
| 2-Serpine1_100765760_r | CTTACCTGCCTTAGGAGCCG |
| 3-Serpine1_100760455_f | CCCCTCCTCTCCTACACCTC |
| 3-Serpine1_100760455_r | AGCAGGCTTCTTGCATGTCT |
